# Supplementary material for: Genome assembly and annotation of a Drosophila simulans strain from Madagascar
Source: PubMed Central journal article supplement (PMC4344813; doi:10.1111/1755-0998.12297), 2014-07-14

**A**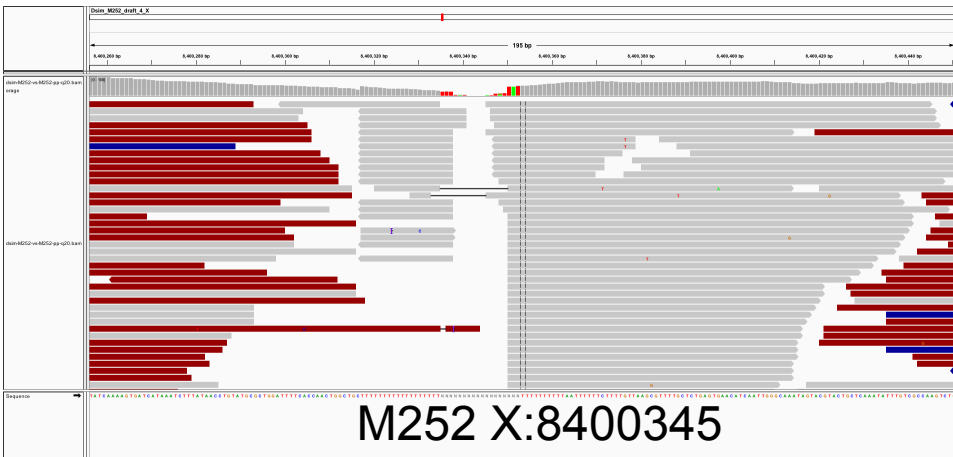**B**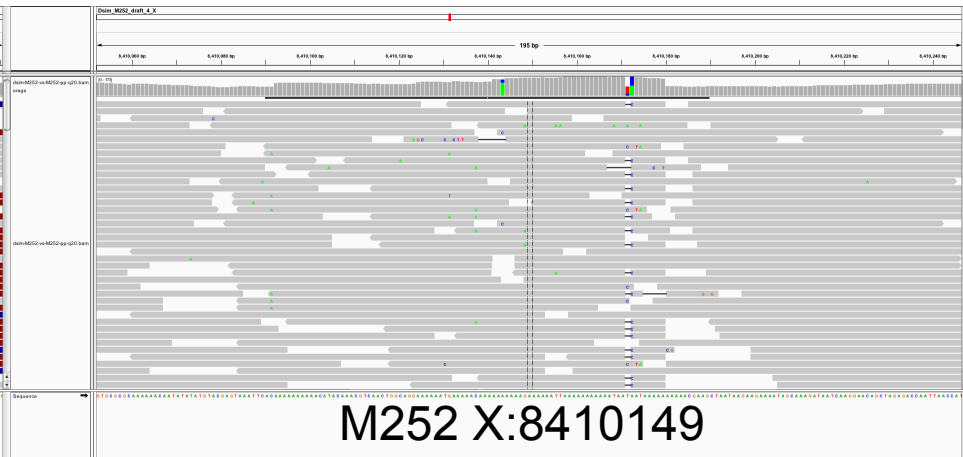**C**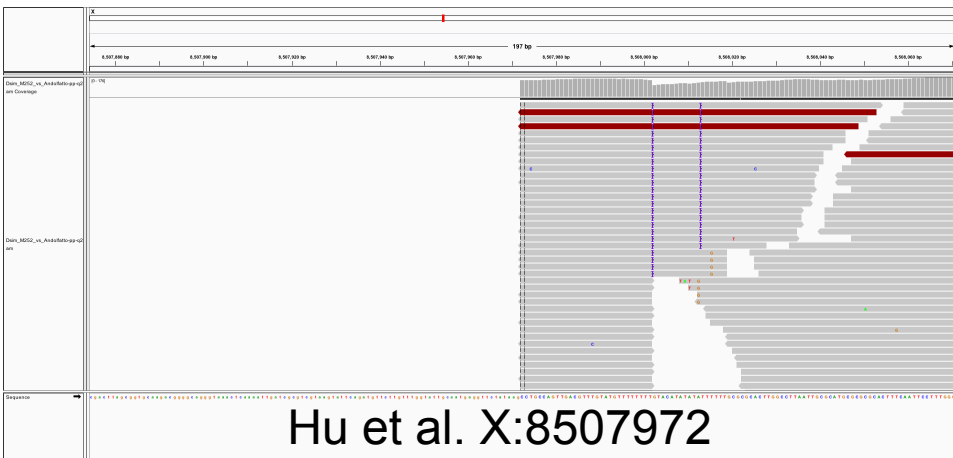**D**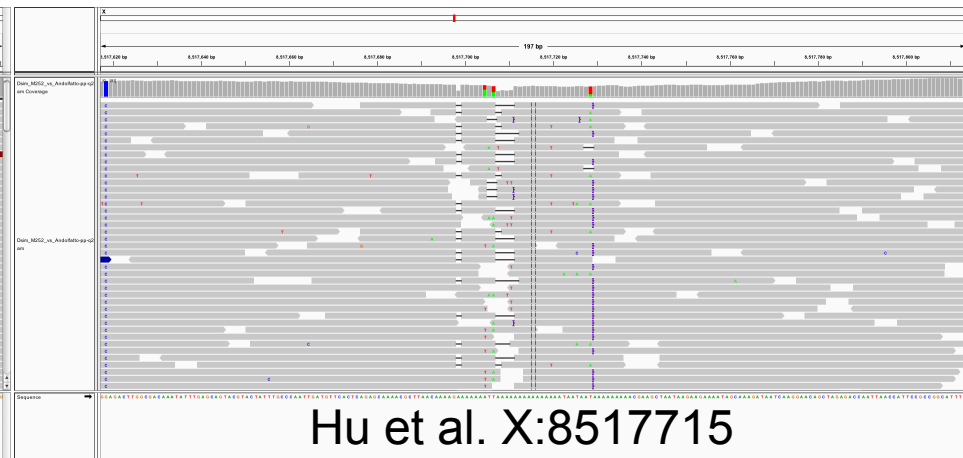

Supplement: men0015-0372-sd4.pdf [file men0015-0372-sd4.pdf]
